# Supplementary material for: DFT study on hydroxy acid–lactone interconversion of statins: the case of fluvastatin
Source: Royal Society of Chemistry journal article supplement (doi:10.1039/b612999b), 2006-01-01
Supplement: b612999b.pdf [file b612999b.pdf]

61

AH

|   |          |          |          |
|---|----------|----------|----------|
| C | 2.15847  | 0.71298  | -0.49154 |
| H | 2.59577  | 0.55901  | -1.48900 |
| C | 2.48138  | 2.13330  | -0.01955 |
| H | 2.02168  | 2.85150  | -0.70607 |
| H | 2.03026  | 2.28186  | 0.96939  |
| C | 3.99325  | 2.41629  | 0.04217  |
| H | 4.12943  | 3.40757  | 0.48849  |
| C | 4.72698  | 1.40496  | 0.94558  |
| H | 5.79927  | 1.63270  | 0.95456  |
| H | 4.35792  | 1.46233  | 1.97301  |
| C | 4.59215  | -0.02638 | 0.49446  |
| O | 2.81606  | -0.19535 | 0.43247  |
| H | 4.77382  | 1.60643  | -1.55671 |
| O | 4.57335  | 2.50680  | -1.25150 |
| O | 4.90344  | -0.93733 | 1.40688  |
| O | 4.97165  | -0.25555 | -0.77058 |
| H | 4.96091  | -1.82174 | 0.94508  |
| H | 4.96309  | -1.25848 | -0.90856 |
| C | 3.55169  | -3.25993 | -0.54150 |
| O | 2.50954  | -2.59439 | -0.30848 |
| O | 4.75263  | -2.84882 | -0.47038 |
| H | 3.40763  | -4.31466 | -0.83639 |
| H | 2.67654  | -1.20051 | 0.11942  |
| C | -2.21477 | 4.54328  | 0.07685  |
| C | -1.57397 | 3.82189  | 1.07833  |
| C | -1.65625 | 2.43104  | 1.06121  |
| C | -2.35856 | 1.75103  | 0.04982  |
| C | -2.99446 | 2.51995  | -0.94098 |
| C | -2.92945 | 3.91376  | -0.93397 |
| F | -2.14237 | 5.89288  | 0.09095  |
| H | -1.03901 | 4.35112  | 1.86062  |
| H | -1.17745 | 1.85778  | 1.84899  |
| C | -2.46304 | 0.27712  | 0.03818  |
| H | -3.53847 | 2.01623  | -1.73472 |
| C | 0.68285  | 0.44031  | -0.56122 |
| H | -3.41663 | 4.50972  | -1.69903 |
| C | -1.43518 | -0.65140 | 0.12805  |
| C | 0.01055  | -0.43391 | 0.19940  |
| H | 0.56246  | -1.03180 | 0.92102  |
| C | -3.69063 | -0.47150 | 0.00454  |
| C | -3.34875 | -1.85013 | 0.07998  |
| C | -4.34221 | -2.84231 | 0.08147  |
| C | -5.67054 | -2.43946 | 0.01534  |
| C | -6.02201 | -1.07603 | -0.04349 |
| C | -5.04407 | -0.09237 | -0.04421 |
| H | -4.09744 | -3.89623 | 0.14270  |
| H | -6.45256 | -3.19399 | 0.01678  |
| H | -7.07095 | -0.79541 | -0.08386 |

|   |          |          |          |
|---|----------|----------|----------|
| H | -5.31483 | 0.95920  | -0.07832 |
| N | -1.96716 | -1.94433 | 0.15989  |
| C | -1.16498 | -3.18140 | 0.08559  |
| H | -0.12283 | -2.85705 | 0.05544  |
| C | -1.41633 | -3.94887 | -1.22123 |
| H | -1.23991 | -3.30011 | -2.08504 |
| H | -0.72565 | -4.79687 | -1.28484 |
| H | -2.43627 | -4.33706 | -1.29020 |
| C | -1.34344 | -4.04864 | 1.34041  |
| H | -0.65899 | -4.90311 | 1.29893  |
| H | -1.11700 | -3.47241 | 2.24355  |
| H | -2.36171 | -4.43726 | 1.43620  |
| H | 0.15702  | 1.03136  | -1.30853 |

61

AL1

|   |          |          |          |
|---|----------|----------|----------|
| C | 2.22841  | 0.62168  | -0.32439 |
| H | 2.70274  | 0.49942  | -1.30642 |
| C | 2.57443  | 2.00561  | 0.22253  |
| H | 2.16847  | 2.75967  | -0.45930 |
| H | 2.08422  | 2.13689  | 1.19547  |
| C | 4.09370  | 2.21440  | 0.34752  |
| H | 4.26273  | 3.20261  | 0.79198  |
| C | 4.70432  | 1.17993  | 1.31204  |
| H | 5.79406  | 1.28416  | 1.33675  |
| H | 4.33804  | 1.36061  | 2.33093  |
| C | 4.40741  | -0.27646 | 1.04328  |
| O | 2.81923  | -0.37191 | 0.57819  |
| H | 4.90156  | 1.30618  | -1.16266 |
| O | 4.73089  | 2.24021  | -0.91256 |
| O | 4.73807  | -1.23906 | 1.65745  |
| O | 5.02750  | -0.44008 | -0.75889 |
| H | 4.57928  | -1.50588 | -1.27928 |
| H | 5.96612  | -0.63901 | -0.59796 |
| C | 3.19991  | -3.06047 | -1.31652 |
| O | 2.44604  | -2.63163 | -0.41586 |
| O | 4.24638  | -2.50297 | -1.79004 |
| H | 2.95235  | -4.02790 | -1.77669 |
| H | 2.69321  | -1.35756 | 0.17501  |
| C | -2.02348 | 4.58878  | -0.13843 |
| C | -1.46100 | 3.90203  | 0.93215  |
| C | -1.58911 | 2.51541  | 0.98164  |
| C | -2.25966 | 1.80532  | -0.03042 |
| C | -2.81613 | 2.53961  | -1.09250 |
| C | -2.70448 | 3.92916  | -1.15333 |
| F | -1.90670 | 5.93407  | -0.18936 |
| H | -0.95023 | 4.45506  | 1.71410  |
| H | -1.17250 | 1.96993  | 1.82275  |
| C | -2.41573 | 0.33671  | 0.02938  |

|   |          |          |          |
|---|----------|----------|----------|
| H | -3.33473 | 2.01142  | -1.88739 |
| C | 0.74979  | 0.38853  | -0.44621 |
| H | -3.13032 | 4.49873  | -1.97312 |
| C | -1.42533 | -0.62156 | 0.19626  |
| C | 0.02360  | -0.45133 | 0.30455  |
| H | 0.53390  | -1.05384 | 1.05249  |
| C | -3.66870 | -0.36778 | -0.00050 |
| C | -3.38114 | -1.75182 | 0.15629  |
| C | -4.41151 | -2.70535 | 0.18407  |
| C | -5.72125 | -2.25788 | 0.06057  |
| C | -6.01915 | -0.88762 | -0.08107 |
| C | -5.00493 | 0.05800  | -0.10713 |
| H | -4.20896 | -3.76254 | 0.30932  |
| H | -6.53131 | -2.98189 | 0.08171  |
| H | -7.05535 | -0.57170 | -0.16510 |
| H | -5.23378 | 1.11550  | -0.20469 |
| N | -2.00671 | -1.89165 | 0.27853  |
| C | -1.25210 | -3.15998 | 0.29335  |
| H | -0.19852 | -2.87522 | 0.26530  |
| C | -1.50598 | -3.99295 | -0.97246 |
| H | -1.29086 | -3.40181 | -1.86832 |
| H | -0.84576 | -4.86726 | -0.97232 |
| H | -2.53745 | -4.34915 | -1.04077 |
| C | -1.48804 | -3.94480 | 1.59200  |
| H | -0.83952 | -4.82754 | 1.61448  |
| H | -1.25435 | -3.32639 | 2.46481  |
| H | -2.52353 | -4.28461 | 1.68841  |
| H | 0.26978  | 0.98767  | -1.21727 |

61

AL2

|   |         |          |          |
|---|---------|----------|----------|
| C | 2.18402 | 0.75189  | -0.59515 |
| H | 2.60425 | 0.73529  | -1.61005 |
| C | 2.43936 | 2.13150  | 0.03033  |
| H | 1.95465 | 2.89362  | -0.58876 |
| H | 1.96804 | 2.15733  | 1.02066  |
| C | 3.93738 | 2.46305  | 0.15476  |
| H | 4.03777 | 3.40212  | 0.71147  |
| C | 4.64994 | 1.34274  | 0.94221  |
| H | 5.71679 | 1.57459  | 1.03389  |
| H | 4.21788 | 1.22946  | 1.93865  |
| C | 4.51094 | 0.05989  | 0.14798  |
| O | 2.89833 | -0.25389 | 0.18970  |
| H | 4.83861 | 1.82066  | -1.44857 |
| O | 4.54187 | 2.68666  | -1.10854 |
| O | 4.86815 | -1.16477 | 1.23643  |
| O | 5.01903 | -0.11687 | -0.94834 |
| H | 5.84095 | -1.20093 | 1.17666  |

|   |          |          |          |
|---|----------|----------|----------|
| H | 2.73437  | -1.32537 | -0.30078 |
| C | 3.26719  | -3.39778 | -0.44331 |
| O | 4.24247  | -3.34303 | 0.35260  |
| O | 2.50451  | -2.44789 | -0.79085 |
| H | 3.04547  | -4.37981 | -0.88280 |
| H | 4.52995  | -2.19263 | 0.80891  |
| C | -2.13055 | 4.56080  | 0.12316  |
| C | -1.46620 | 3.82306  | 1.09695  |
| C | -1.55748 | 2.43299  | 1.06471  |
| C | -2.29223 | 1.77008  | 0.06530  |
| C | -2.95091 | 2.55510  | -0.89755 |
| C | -2.87705 | 3.94824  | -0.87503 |
| F | -2.05004 | 5.90947  | 0.15241  |
| H | -0.90530 | 4.33911  | 1.86976  |
| H | -1.05992 | 1.84720  | 1.83140  |
| C | -2.40907 | 0.29711  | 0.03939  |
| H | -3.52022 | 2.06480  | -1.68190 |
| C | 0.71696  | 0.43829  | -0.65575 |
| H | -3.38150 | 4.55664  | -1.61881 |
| C | -1.38808 | -0.64188 | 0.08677  |
| C | 0.06168  | -0.43512 | 0.12092  |
| H | 0.63160  | -1.02979 | 0.83212  |
| C | -3.64546 | -0.43842 | 0.03583  |
| C | -3.31683 | -1.82099 | 0.08618  |
| C | -4.31992 | -2.80292 | 0.10961  |
| C | -5.64545 | -2.38573 | 0.08940  |
| C | -5.98361 | -1.01827 | 0.05512  |
| C | -4.99552 | -0.04486 | 0.03351  |
| H | -4.08482 | -3.86004 | 0.15287  |
| H | -6.43508 | -3.13204 | 0.10802  |
| H | -7.03016 | -0.72615 | 0.05060  |
| H | -5.25587 | 1.00974  | 0.01861  |
| N | -1.93422 | -1.92970 | 0.12118  |
| C | -1.14927 | -3.17178 | 0.00179  |
| H | -0.10787 | -2.84943 | -0.06191 |
| C | -1.45183 | -3.91945 | -1.30590 |
| H | -1.29292 | -3.26232 | -2.16654 |
| H | -0.77726 | -4.77753 | -1.40213 |
| H | -2.47898 | -4.29194 | -1.34662 |
| C | -1.28999 | -4.05513 | 1.25054  |
| H | -0.62118 | -4.91962 | 1.17160  |
| H | -1.02243 | -3.49524 | 2.15272  |
| H | -2.30926 | -4.43101 | 1.37901  |
| H | 0.16924  | 1.02984  | -1.38666 |

61

HL1

|   |         |         |          |
|---|---------|---------|----------|
| C | 2.14467 | 0.87852 | -0.44670 |
| H | 2.60439 | 0.75924 | -1.43620 |

|   |          |          |          |
|---|----------|----------|----------|
| C | 2.43903  | 2.28889  | 0.07081  |
| H | 2.04230  | 3.01842  | -0.64215 |
| H | 1.92384  | 2.43855  | 1.02819  |
| C | 3.95526  | 2.50641  | 0.23123  |
| H | 4.12484  | 3.48354  | 0.69662  |
| C | 4.51435  | 1.41939  | 1.16779  |
| H | 5.60674  | 1.42852  | 1.18310  |
| H | 4.17202  | 1.59944  | 2.19603  |
| C | 4.02519  | 0.03368  | 0.81956  |
| O | 2.76541  | -0.12367 | 0.41565  |
| H | 4.76644  | 1.62089  | -1.29884 |
| O | 4.62127  | 2.54749  | -1.01538 |
| O | 4.51072  | -0.95678 | 1.48875  |
| O | 4.90487  | -0.17782 | -0.90975 |
| H | 4.11763  | -1.87796 | 1.10547  |
| H | 5.83772  | -0.31947 | -0.67517 |
| C | 3.68891  | -3.19295 | -0.76444 |
| O | 4.07414  | -2.34326 | -1.63195 |
| O | 3.66180  | -3.08248 | 0.48327  |
| H | 3.33515  | -4.14679 | -1.18927 |
| H | 4.49473  | -1.24774 | -1.25196 |
| C | -2.34883 | 4.50221  | -0.00107 |
| C | -1.73329 | 3.81729  | 1.04125  |
| C | -1.76149 | 2.42417  | 1.03766  |
| C | -2.38470 | 1.70720  | 0.00050  |
| C | -2.99819 | 2.43936  | -1.03094 |
| C | -2.98636 | 3.83487  | -1.03880 |
| F | -2.32833 | 5.85336  | -0.00065 |
| H | -1.25953 | 4.37555  | 1.84257  |
| H | -1.30160 | 1.87756  | 1.85528  |
| C | -2.43783 | 0.22947  | 0.00761  |
| H | -3.48309 | 1.90582  | -1.84335 |
| C | 0.68214  | 0.56163  | -0.53317 |
| H | -3.45642 | 4.40336  | -1.83483 |
| C | -1.37999 | -0.66511 | 0.10564  |
| C | 0.05676  | -0.40075 | 0.16007  |
| H | 0.65644  | -1.02793 | 0.81467  |
| C | -3.64185 | -0.55432 | -0.01038 |
| C | -3.26065 | -1.92102 | 0.08540  |
| C | -4.22647 | -2.94037 | 0.10371  |
| C | -5.56548 | -2.57530 | 0.03421  |
| C | -5.95534 | -1.22322 | -0.04520 |
| C | -5.00532 | -0.21315 | -0.06320 |
| H | -3.95401 | -3.98662 | 0.17831  |
| H | -6.32602 | -3.35131 | 0.04803  |
| H | -7.01178 | -0.97299 | -0.08869 |
| H | -5.30414 | 0.83008  | -0.11500 |
| N | -1.87679 | -1.97355 | 0.16149  |
| C | -1.04745 | -3.19255 | 0.13734  |
| H | -0.01406 | -2.84041 | 0.12256  |

|   |          |          |          |
|---|----------|----------|----------|
| C | -1.25476 | -4.00141 | -1.15244 |
| H | -1.07176 | -3.37471 | -2.03110 |
| H | -0.55166 | -4.84134 | -1.17735 |
| H | -2.26708 | -4.40696 | -1.23067 |
| C | -1.22513 | -4.02823 | 1.41371  |
| H | -0.51680 | -4.86390 | 1.41035  |
| H | -1.03148 | -3.41923 | 2.30261  |
| H | -2.23400 | -4.44141 | 1.50175  |
| H | 0.12888  | 1.19623  | -1.22112 |

61  
HL2

|   |          |          |          |
|---|----------|----------|----------|
| C | 2.14674  | 0.90028  | -0.49129 |
| H | 2.58470  | 0.81764  | -1.49762 |
| C | 2.42904  | 2.31312  | 0.04983  |
| H | 2.03962  | 3.05934  | -0.65053 |
| H | 1.90252  | 2.43754  | 1.00436  |
| C | 3.94021  | 2.54838  | 0.25155  |
| H | 4.08440  | 3.50672  | 0.76301  |
| C | 4.52182  | 1.41632  | 1.13326  |
| H | 5.60763  | 1.52593  | 1.21245  |
| H | 4.07414  | 1.44001  | 2.13050  |
| C | 4.16796  | 0.11182  | 0.44387  |
| O | 2.78707  | -0.08043 | 0.35857  |
| H | 4.87960  | 1.75026  | -1.25804 |
| O | 4.63196  | 2.65323  | -0.98357 |
| O | 4.44224  | -1.10036 | 1.55804  |
| O | 4.86687  | -0.17076 | -0.61572 |
| H | 5.41330  | -1.19501 | 1.56122  |
| H | 4.42230  | -1.22558 | -1.19728 |
| C | 3.65828  | -3.11412 | -0.91504 |
| O | 3.63785  | -3.10383 | 0.33720  |
| O | 4.05329  | -2.19333 | -1.70650 |
| H | 3.29935  | -4.02205 | -1.41991 |
| H | 4.06421  | -1.99151 | 1.03753  |
| C | -2.40727 | 4.49069  | 0.00176  |
| C | -1.75078 | 3.81556  | 1.02524  |
| C | -1.75748 | 2.42226  | 1.02236  |
| C | -2.39982 | 1.69526  | 0.00398  |
| C | -3.05377 | 2.41784  | -1.00930 |
| C | -3.06411 | 3.81335  | -1.01716 |
| F | -2.40828 | 5.84235  | 0.00214  |
| H | -1.26110 | 4.38111  | 1.81171  |
| H | -1.26411 | 1.88325  | 1.82520  |
| C | -2.43198 | 0.21716  | 0.01278  |
| H | -3.55304 | 1.87687  | -1.80799 |
| C | 0.68427  | 0.58135  | -0.56881 |
| H | -3.56543 | 4.37427  | -1.79939 |
| C | -1.36102 | -0.66260 | 0.09918  |

|   |          |          |          |
|---|----------|----------|----------|
| C | 0.07381  | -0.38196 | 0.13634  |
| H | 0.68943  | -0.99457 | 0.79012  |
| C | -3.62624 | -0.58269 | 0.00754  |
| C | -3.22650 | -1.94427 | 0.09944  |
| C | -4.17828 | -2.97621 | 0.12840  |
| C | -5.52316 | -2.62936 | 0.07325  |
| C | -5.93133 | -1.28283 | -0.00168 |
| C | -4.99456 | -0.26023 | -0.03002 |
| H | -3.89139 | -4.01893 | 0.20009  |
| H | -6.27300 | -3.41558 | 0.09501  |
| H | -6.99136 | -1.04618 | -0.03345 |
| H | -5.30790 | 0.77890  | -0.07788 |
| N | -1.84103 | -1.97775 | 0.16035  |
| C | -0.99632 | -3.18444 | 0.12865  |
| H | 0.03173  | -2.81745 | 0.10419  |
| C | -1.20519 | -3.99708 | -1.15875 |
| H | -1.03669 | -3.36887 | -2.03929 |
| H | -0.49399 | -4.83030 | -1.18908 |
| H | -2.21381 | -4.41317 | -1.22853 |
| C | -1.14982 | -4.02243 | 1.40686  |
| H | -0.43116 | -4.84938 | 1.39659  |
| H | -0.95503 | -3.41020 | 2.29329  |
| H | -2.15239 | -4.44824 | 1.50555  |
| H | 0.11806  | 1.21101  | -1.25114 |

55

LO

|   |          |          |          |
|---|----------|----------|----------|
| C | -1.18311 | -0.01097 | 0.58611  |
| C | -0.33463 | -0.76092 | -0.13512 |
| C | 1.12509  | -0.68934 | -0.07072 |
| C | 1.97691  | 0.40864  | -0.01574 |
| C | 1.61852  | 1.83993  | -0.06800 |
| C | 0.71404  | 2.34333  | -1.02200 |
| C | 0.40745  | 3.70039  | -1.08771 |
| C | 1.02254  | 4.57191  | -0.19614 |
| C | 2.20989  | 2.75725  | 0.81935  |
| C | 1.92260  | 4.12189  | 0.75949  |
| F | 0.73725  | 5.89599  | -0.26282 |
| H | -0.29403 | 4.08739  | -1.81998 |
| H | 0.24191  | 1.65671  | -1.71639 |
| H | 2.89505  | 2.39234  | 1.57892  |
| H | 2.37624  | 4.82921  | 1.44692  |
| H | -0.78058 | -1.48706 | -0.81075 |
| C | 3.32077  | -0.10670 | 0.02957  |
| C | 3.23172  | -1.52753 | -0.00607 |
| C | 4.38366  | -2.32732 | 0.00525  |
| C | 5.62449  | -1.69769 | 0.04441  |
| C | 5.72762  | -0.29434 | 0.06069  |
| C | 4.58843  | 0.50108  | 0.04859  |

|   |          |          |          |
|---|----------|----------|----------|
| H | 4.32606  | -3.40962 | -0.02493 |
| H | 6.52690  | -2.30409 | 0.05497  |
| H | 6.71017  | 0.17113  | 0.07822  |
| H | 4.67272  | 1.58421  | 0.04664  |
| N | 1.88863  | -1.86464 | -0.06743 |
| C | 1.32004  | -3.21990 | 0.02373  |
| H | 0.23918  | -3.07282 | 0.04963  |
| C | 1.70019  | -3.91716 | 1.33918  |
| H | 1.41303  | -3.29699 | 2.19419  |
| H | 1.16686  | -4.87147 | 1.41481  |
| H | 2.77256  | -4.12119 | 1.41109  |
| C | 1.64215  | -4.05840 | -1.22198 |
| H | 1.12200  | -5.02133 | -1.16576 |
| H | 1.30670  | -3.54231 | -2.12720 |
| H | 2.71395  | -4.25700 | -1.32234 |
| H | -0.80258 | 0.72391  | 1.29448  |
| H | -5.06953 | 0.24762  | -1.90935 |
| C | -5.20484 | -0.12508 | -0.88050 |
| C | -4.87228 | 1.00524  | 0.12174  |
| H | -6.24674 | -0.43450 | -0.77229 |
| C | -4.34867 | -1.38228 | -0.77551 |
| C | -3.33710 | 1.21446  | 0.09316  |
| H | -5.34678 | 1.93398  | -0.24929 |
| O | -5.31085 | 0.74748  | 1.41466  |
| O | -3.00665 | -1.16857 | -0.39181 |
| O | -4.55918 | -2.39279 | -1.41428 |
| C | -2.67577 | -0.10873 | 0.50121  |
| H | -3.06535 | 1.99885  | 0.81020  |
| H | -2.97972 | 1.51507  | -0.90343 |
| H | -3.07492 | -0.34934 | 1.49869  |
| H | -5.27925 | -0.35563 | 1.49613  |
| O | -5.17902 | -1.68344 | 1.24662  |
| H | -4.43212 | -2.07637 | 1.72478  |

58

OS

|   |          |          |          |
|---|----------|----------|----------|
| C | -1.00201 | 0.42935  | 0.58057  |
| C | -0.27849 | -0.41252 | -0.17298 |
| C | 1.16513  | -0.62916 | -0.10256 |
| C | 2.22464  | 0.26938  | -0.03685 |
| C | 2.16195  | 1.74245  | -0.07688 |
| C | 1.34465  | 2.42691  | -0.99684 |
| C | 1.31466  | 3.81854  | -1.04845 |
| C | 2.12230  | 4.54135  | -0.17794 |
| C | 2.95523  | 2.51600  | 0.79065  |
| C | 2.94600  | 3.91099  | 0.74381  |
| F | 2.10567  | 5.89749  | -0.23138 |
| H | 0.68152  | 4.34468  | -1.75605 |
| H | 0.72085  | 1.85587  | -1.67596 |



|   |          |          |          |
|---|----------|----------|----------|
| H | 3.57762  | 2.01491  | 1.52598  |
| H | 3.55612  | 4.50644  | 1.41616  |
| H | -0.84892 | -1.02440 | -0.86902 |
| C | 3.43242  | -0.51377 | 0.01438  |
| C | 3.04857  | -1.88547 | -0.02425 |
| C | 4.00795  | -2.90796 | -0.00358 |
| C | 5.35297  | -2.55237 | 0.04376  |
| C | 5.74717  | -1.20170 | 0.05935  |
| C | 4.79936  | -0.18551 | 0.04061  |
| H | 3.72375  | -3.95373 | -0.03270 |
| H | 6.10835  | -3.33433 | 0.06099  |
| H | 6.80528  | -0.95156 | 0.08219  |
| H | 5.10998  | 0.85566  | 0.03831  |
| N | 1.66563  | -1.93697 | -0.09801 |
| C | 0.82466  | -3.14701 | -0.00665 |
| H | -0.20657 | -2.79125 | -0.00273 |
| C | 1.03187  | -3.88984 | 1.32140  |
| H | 0.87125  | -3.21022 | 2.16433  |
| H | 0.30239  | -4.70333 | 1.39810  |
| H | 2.03542  | -4.31703 | 1.41282  |
| C | 0.98446  | -4.05041 | -1.23778 |
| H | 0.25378  | -4.86491 | -1.18754 |
| H | 0.79768  | -3.48300 | -2.15522 |
| H | 1.98424  | -4.49150 | -1.30835 |
| H | -0.52562 | 1.07719  | 1.31715  |
| O | -5.12153 | 1.71456  | 1.42859  |
| C | -4.59524 | 1.84501  | 0.10781  |
| H | -5.13528 | 0.74895  | 1.59692  |
| C | -3.05396 | 1.86208  | 0.12492  |
| H | -4.94446 | 2.82470  | -0.25093 |
| C | -5.14279 | 0.75623  | -0.83377 |
| C | -2.50922 | 0.46749  | 0.49727  |
| H | -2.71538 | 2.62450  | 0.83969  |
| H | -2.67393 | 2.13148  | -0.87067 |
| H | -6.24068 | 0.78464  | -0.80874 |
| H | -4.82666 | 0.95125  | -1.86354 |
| C | -4.70547 | -0.68056 | -0.51299 |
| H | -2.87102 | 0.26034  | 1.52713  |
| O | -2.97128 | -0.48704 | -0.40434 |
| O | -4.90007 | -1.60207 | -1.33291 |
| O | -5.02718 | -0.94349 | 0.86994  |
| H | -4.62820 | -1.82656 | 1.03040  |
| H | -2.81601 | -2.22057 | 0.17901  |
| O | -3.21737 | -3.11596 | 0.29422  |
| H | -3.86755 | -3.03194 | -0.44140 |
